# Supplementary material
Source: Springer Nature journal article supplement (https://www.springermedizin.de/resource/supplementary/12873_2010_132_MOESM3_ESM.pdf/9431478)

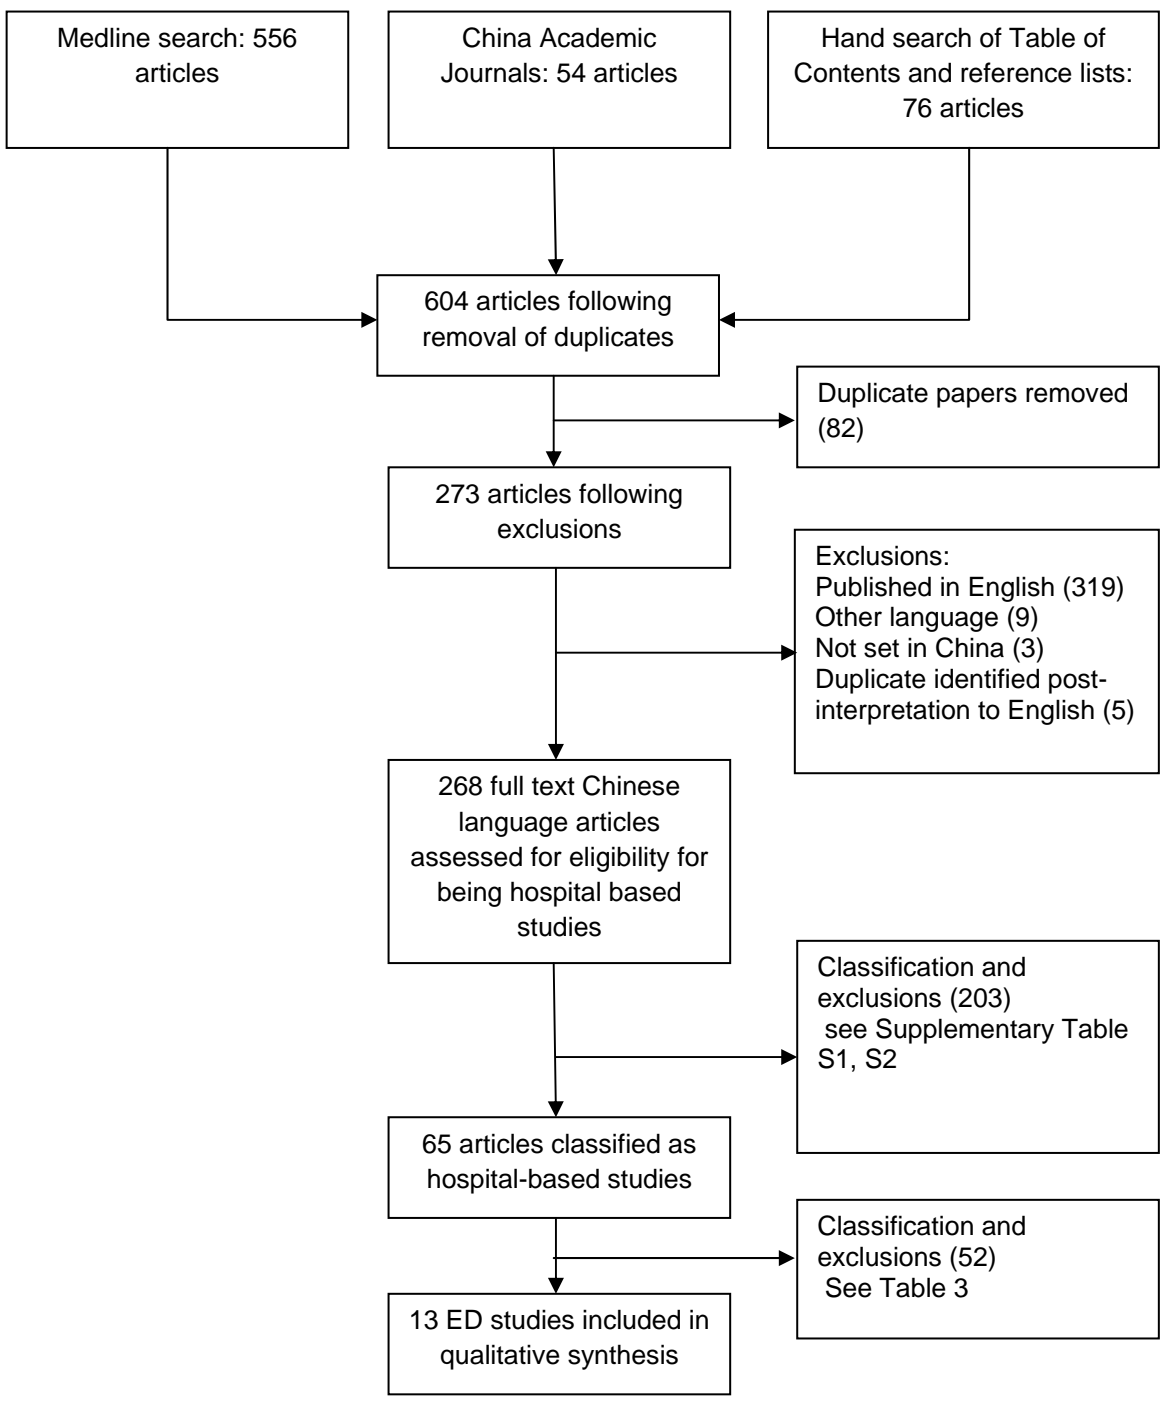

Supplement: MOESM3 [file 9431478]
